# Supplementary material for: Machine Learning for Early Outcome Prediction in Septic Patients in the Emergency Department
Source: MDPI journal article supplement (doi:10.3390/a16020076), 2023-02-01
Supplement: s1 [file s1]

Supplemental Figure S1: Heat maps of missing data by outcome

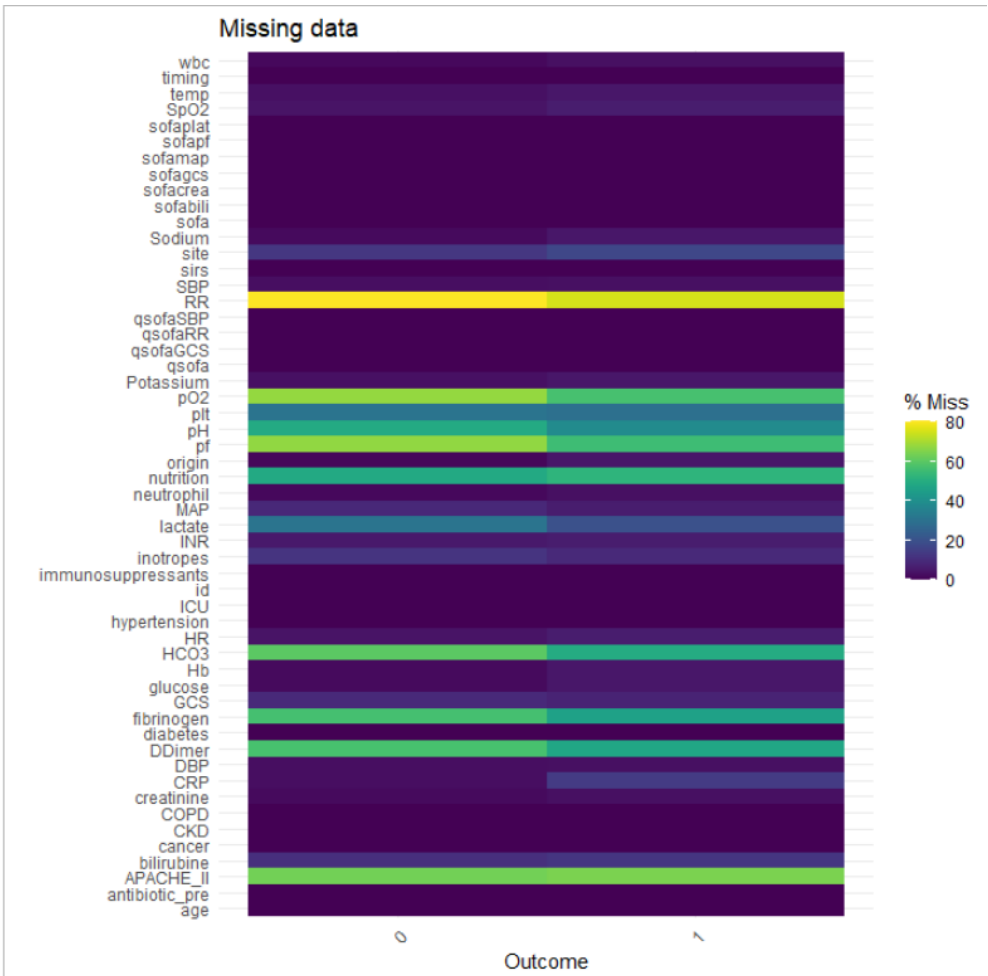

## Supplemental Figure S2: Results of imputation of missing data by chained random forest

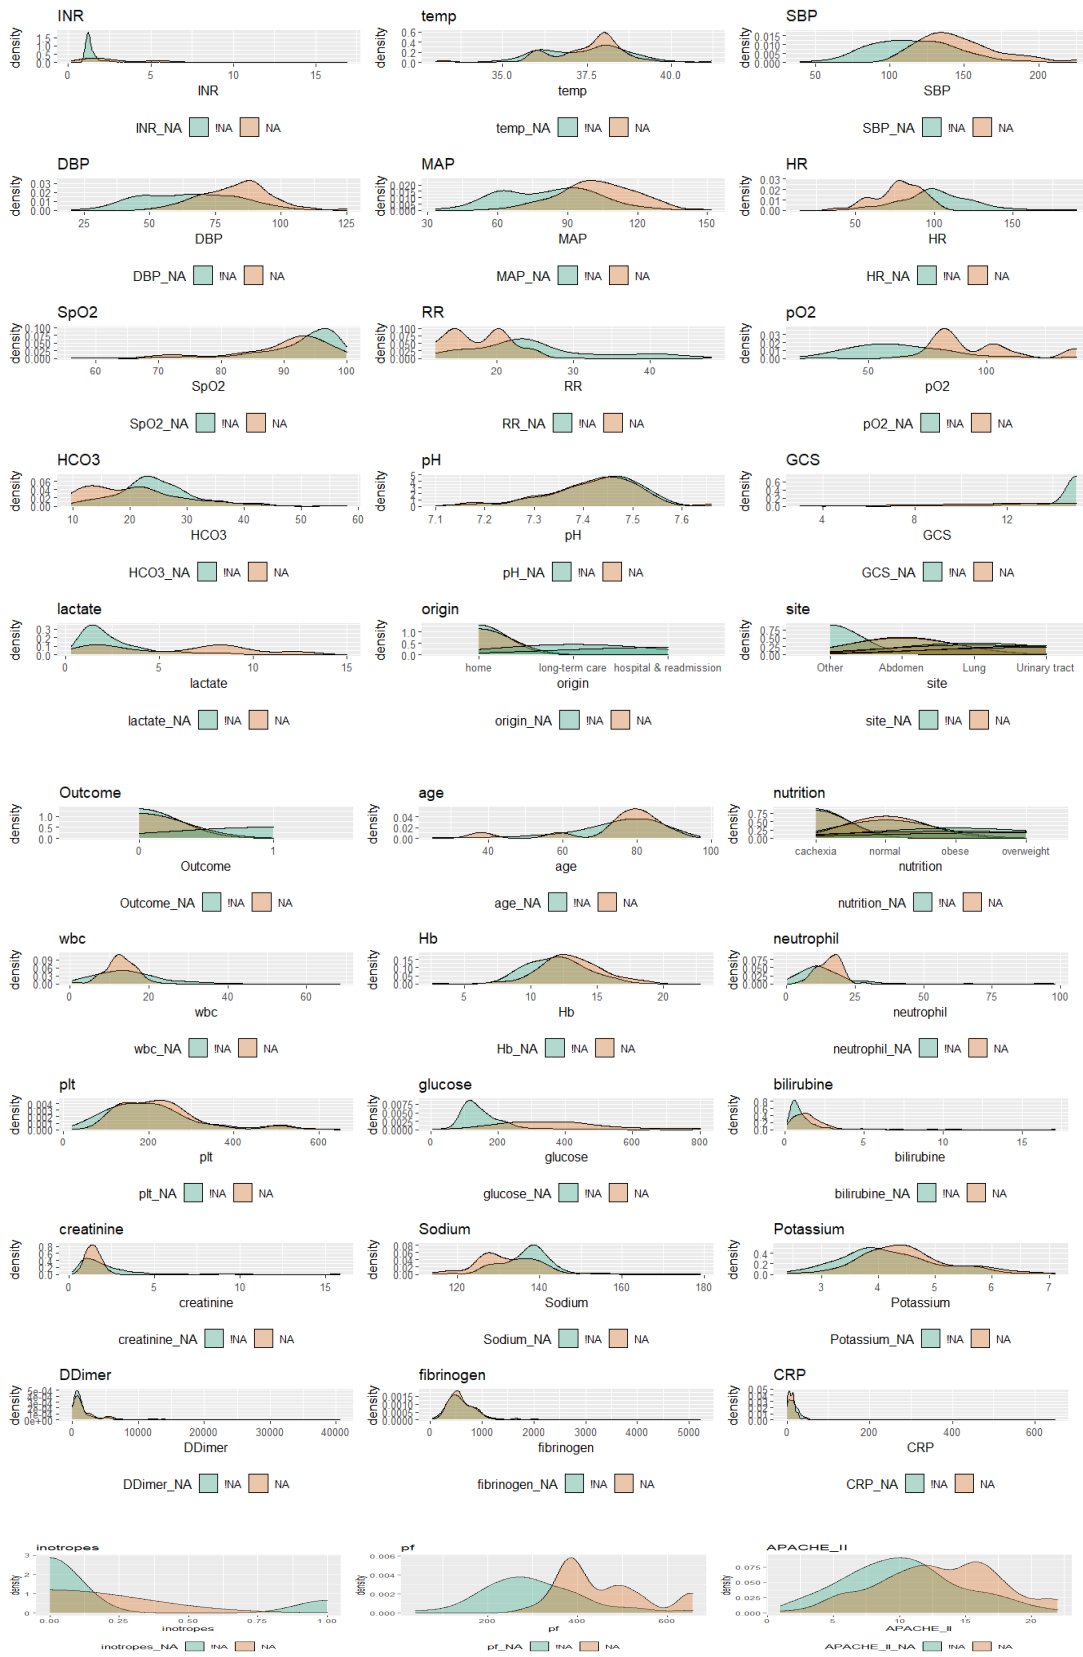

**Supplemental Table S1: Variables included in study**

|                                  |                                       |                          |                                  |            |
|----------------------------------|---------------------------------------|--------------------------|----------------------------------|------------|
| Demographics                     | Age                                   | Gender                   |                                  |            |
| Provenience                      | Home                                  | Long-term care           | Hospital readmission             |            |
| Comorbidities                    | Cancer                                | Hypertension             | COPD                             |            |
|                                  | Diabetes                              | CKD                      |                                  |            |
|                                  | Immunosuppressants as home medication |                          | Recent use of antibiotic therapy |            |
| Nutritional Status               | Underweight                           | Normal                   | Obese                            | Overweight |
| Delay to ED presentation         | <12h                                  | 24-48h                   | >48h                             |            |
| Site of infection                | Abdomen                               | Lung                     | Urinary tract                    | Other      |
| Clinical data at ED presentation | Systolic BP                           | Diastolic BP             | MAP                              |            |
|                                  | Heart Rate                            | Peripheral Saturation    | Respiratory Rate                 |            |
|                                  | Temperature                           | Glasgow Coma Scale (GCS) | Septic Shock                     |            |
| Hematological exams              | White blood cell count                | Hemoglobin               | Neutrophils                      | Platelets  |
|                                  | Glucose                               | Bilirubin                | Creatinine                       |            |
|                                  | Serum sodium                          | Serum potassium          | D-dimer                          | Fibrinogen |
|                                  | C-Reactive Protein                    | INR                      |                                  |            |
| Blood gas analysis               | PaO2                                  | PaO2/FiO2 ratio          | Bicarbonate                      |            |
|                                  | pH                                    | Lactate                  |                                  |            |
| Clinical scores                  | APACHE II                             | SOFA                     | Vasopressors in ED               |            |
| Blood and urinary culture        | Blood culture                         | Urinary culture          |                                  |            |

## Supplemental Material File S1: Sepsis Criteria

Levy et al. in 2001 well defined the diagnostic criteria for sepsis in a pivotal study. Based on what was reported in the paper, we defined septic patients as follows and we collected data accordingly.

### **General variables**

Infection, documented or suspected, and some of the following:

Fever (core temperature  $>38.3^{\circ}\text{C}$ )

Hypothermia (core temperature  $<36^{\circ}\text{C}$ )

Heart rate  $>90\text{ min}^{-1}$  or  $>2$  SD above the normal value for age

Tachypnea

Altered mental status

Significant edema or positive fluid balance ( $>20\text{ mL/kg}$  over 24 hrs)

Hyperglycemia (plasma glucose  $>120\text{ mg/dL}$  or  $7.7\text{ mmol/L}$ ) in the absence of diabetes

### **Inflammatory variables**

Leukocytosis (WBC count  $>12,000\text{ uL}^{-1}$ )

Leukopenia (WBC count  $<4000\text{ uL}^{-1}$ )

Normal WBC count with  $>10\%$  immature forms

Plasma C-reactive protein  $>2$  SD above the normal value

Plasma procalcitonin  $>2$  SD above the normal value

### **Hemodynamic variables**

Arterial hypotension (SBP  $<90\text{ mm Hg}$ , MAP  $<70$ , or an SBP decrease  $>40\text{ mm Hg}$  in adults or  $>2$  SD below normal for age) SvO<sub>2</sub>  $>70\%$

Cardiac index  $>3.5\text{ L}\cdot\text{min}^{-1}\cdot\text{M}^{-2.3}$

### **Organ dysfunction variables**

Arterial hypoxemia (PaO<sub>2</sub>/FIO<sub>2</sub>  $<300$ )

Acute oliguria (urine output  $<0.5\text{ mL}\cdot\text{kg}^{-1}\cdot\text{hr}^{-1}$  or  $45\text{ mmol/L}$  for at least 2 hrs)

Creatinine increase  $>0.5\text{ mg/dL}$

Coagulation abnormalities (INR  $>1.5$  or aPTT  $>60\text{ secs}$ )

Ileus (absent bowel sounds)

Thrombocytopenia (platelet count  $<100,000\text{ uL}^{-1}$ )

Hyperbilirubinemia (plasma total bilirubin  $>4\text{ mg/dL}$  or  $70\text{ mmol/L}$ )

Tissue perfusion variables Hyperlactatemia ( $>1\text{ mmol/L}$ )

Decreased capillary refill or mottling
